# Supplementary material
Source: PubMed Central journal article supplement (PMC10843605)

**Figure 1**

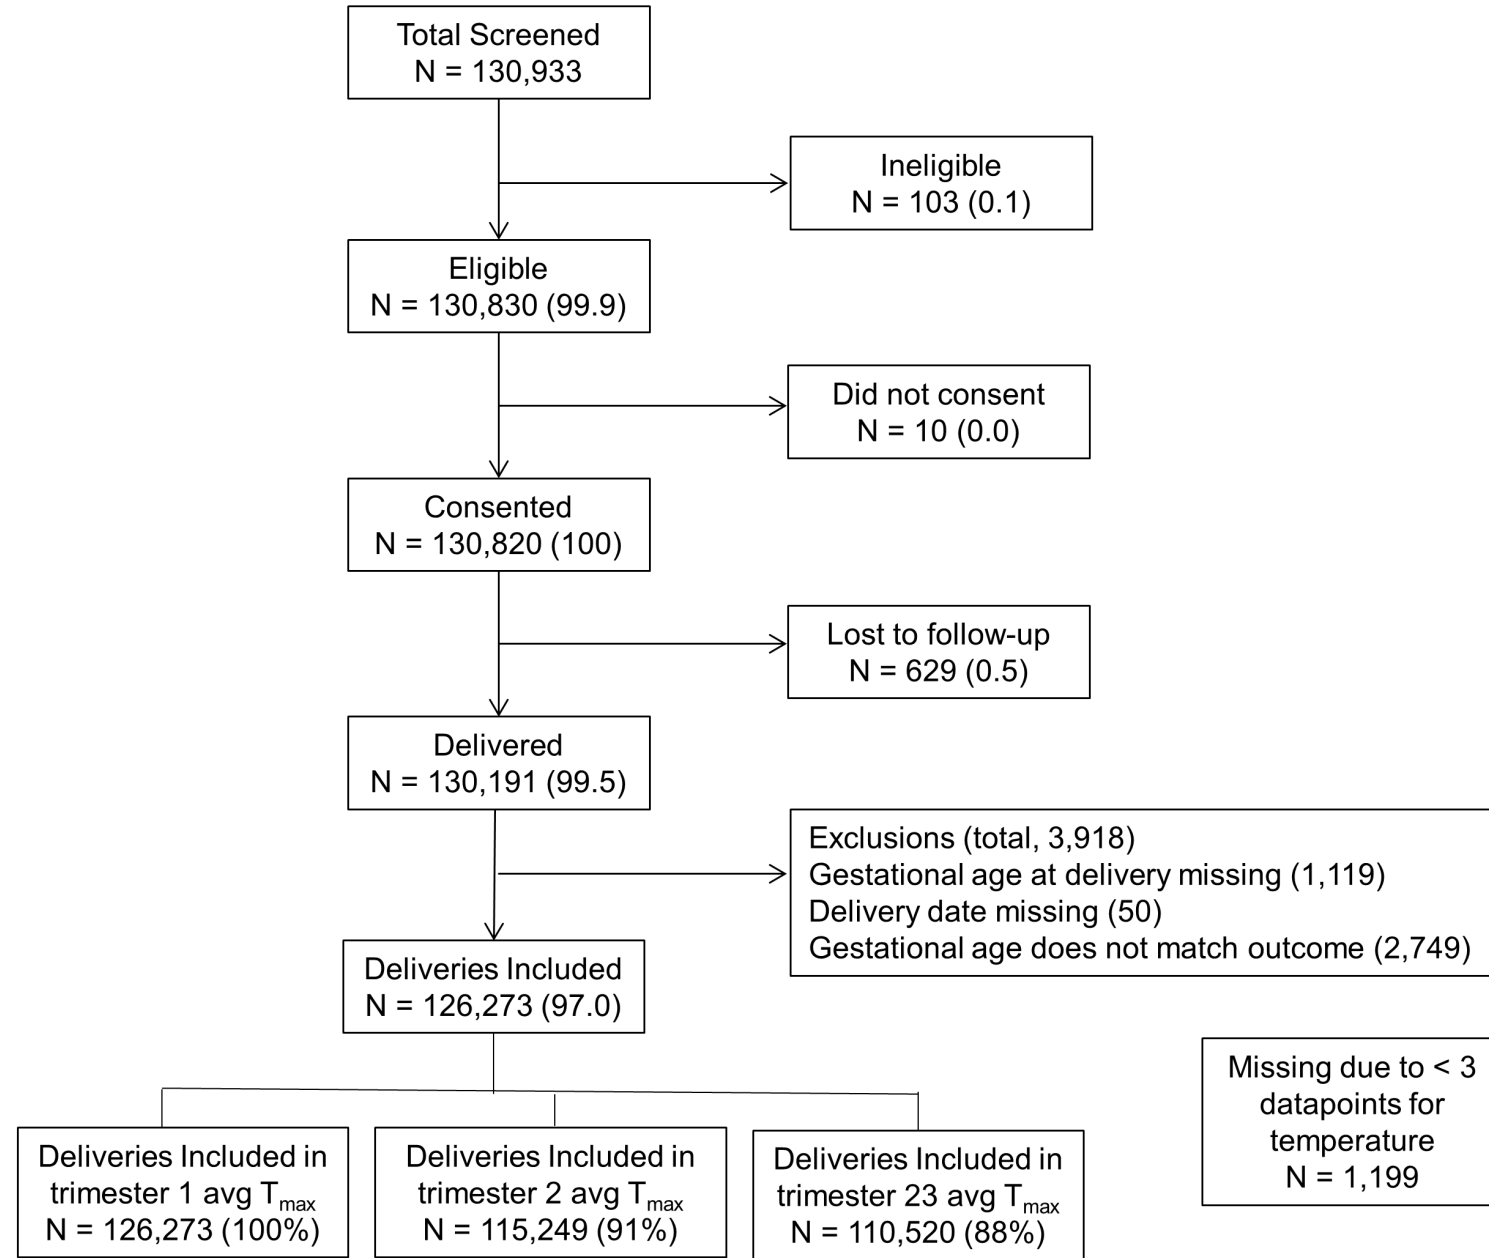

**Figure 2**

Daily maximum temperatures

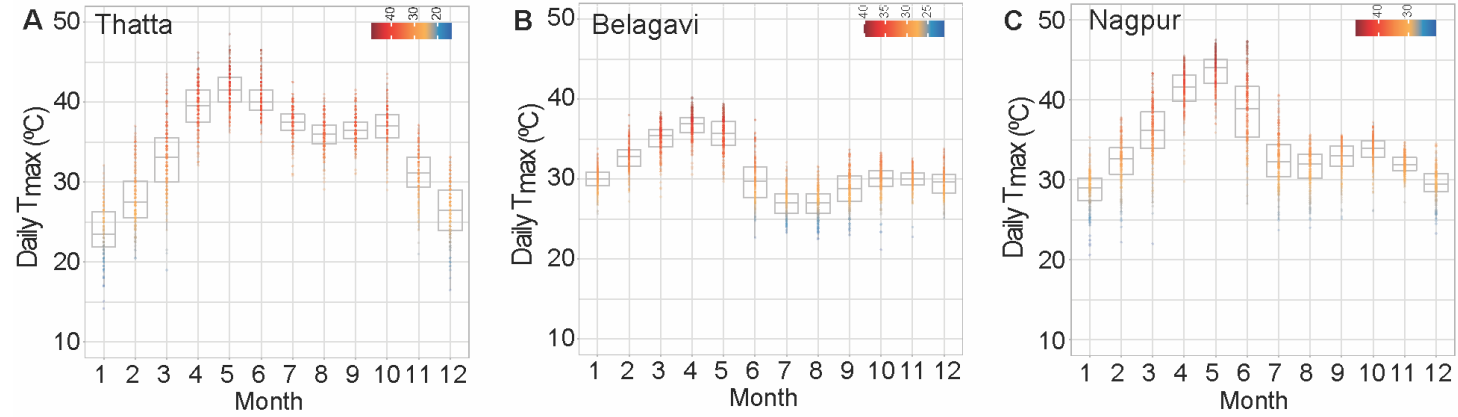

**Figure 3**

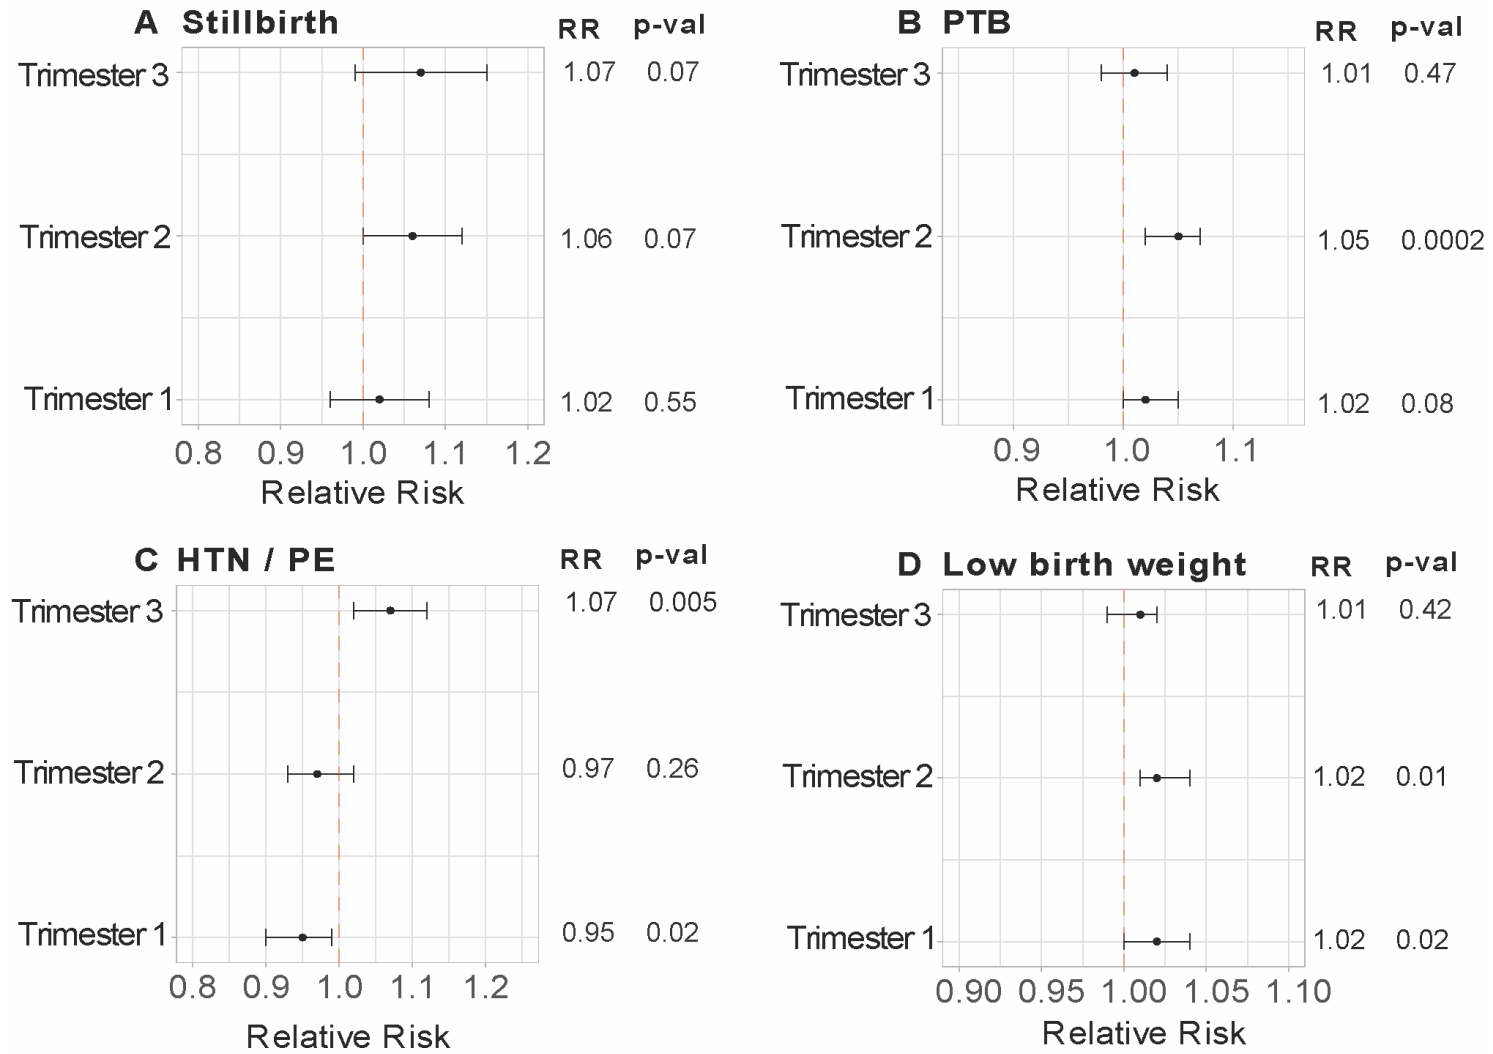

Figure S1

Stillbirths

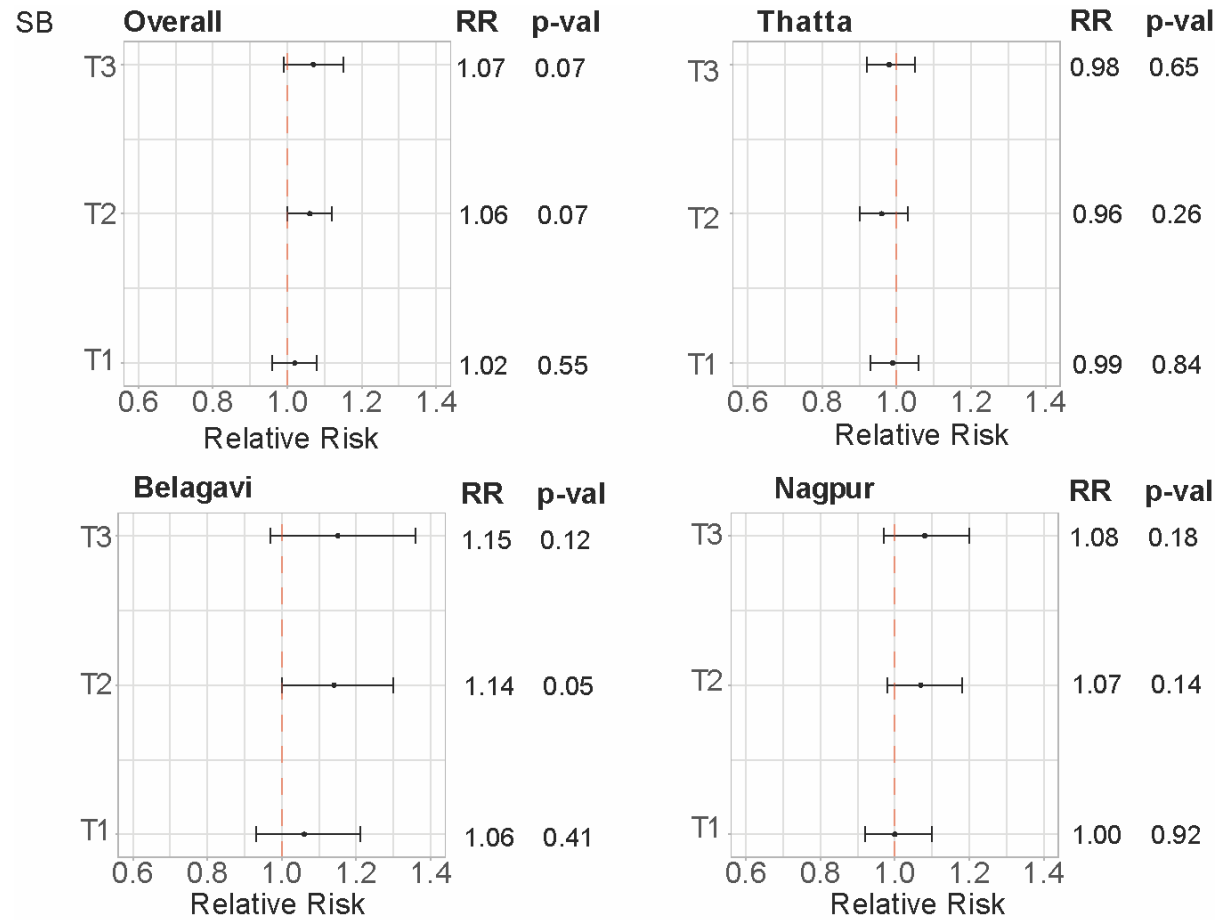

Figure S2

Preterm Birth

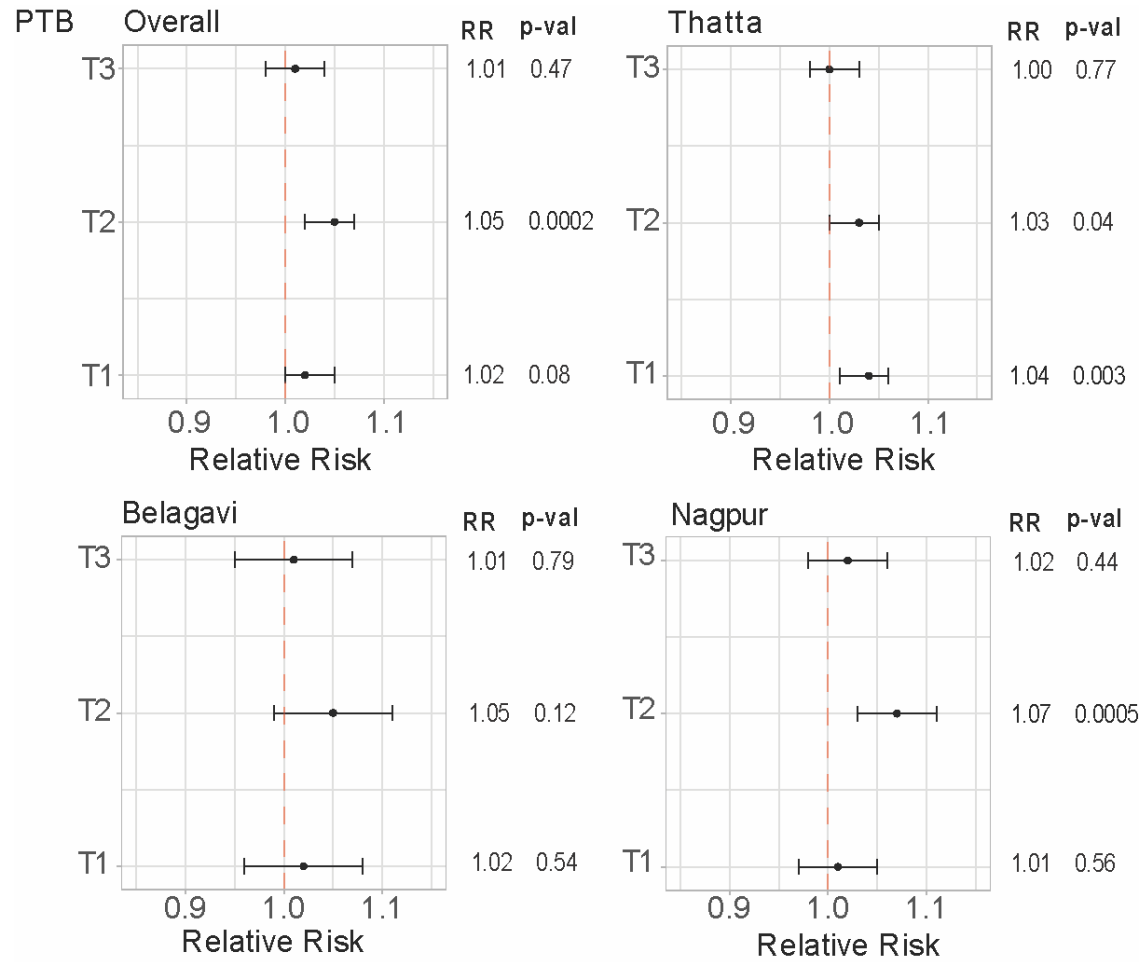

Figure S3

PE / HTN

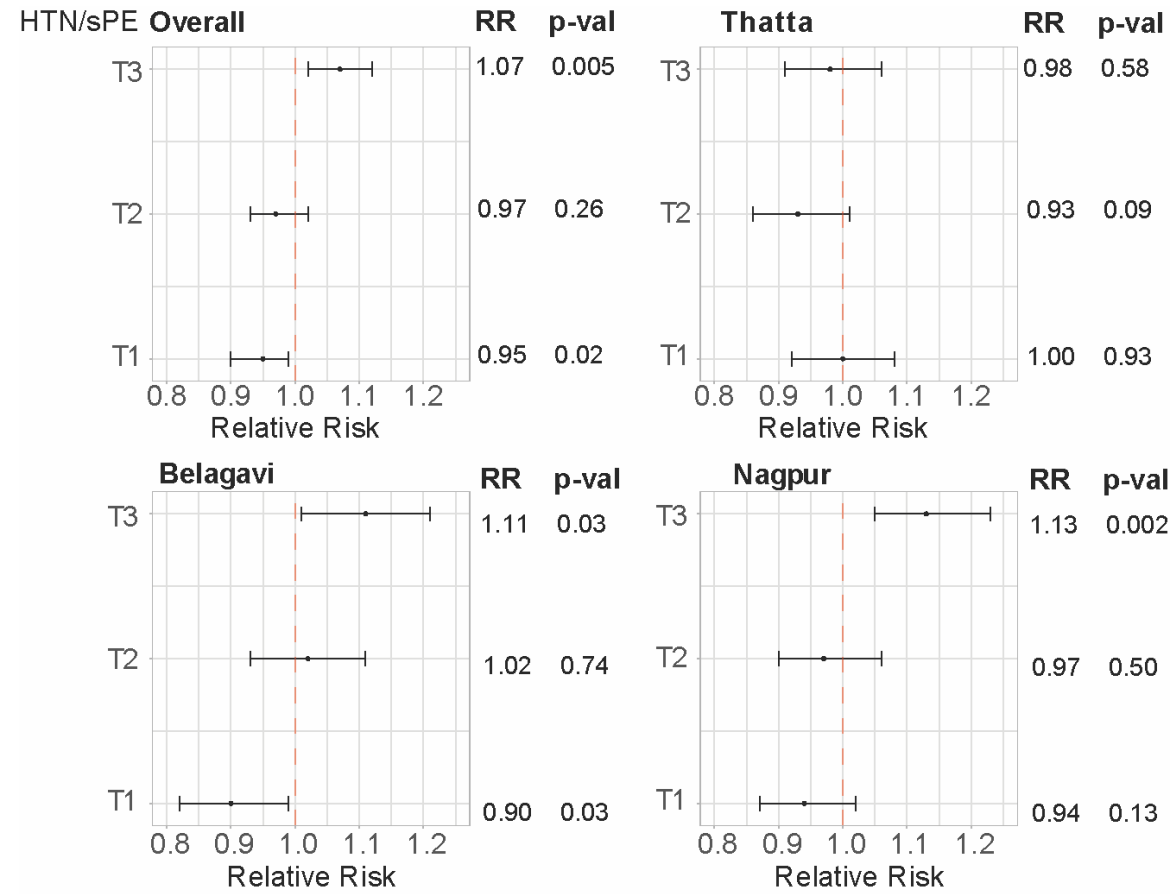

Figure S4

Low Birth Weight

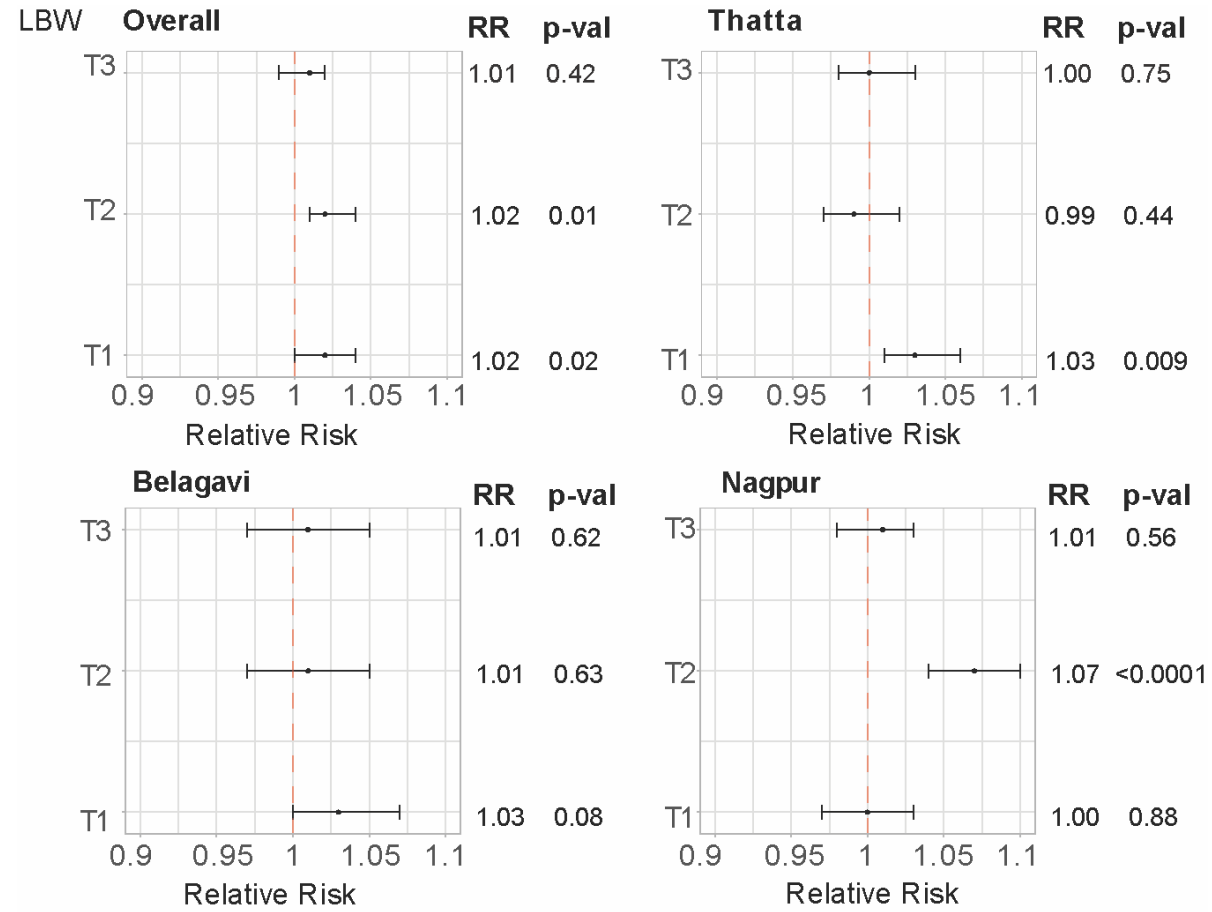

Supplement: NIHMS1920544-supplement-Supinfo.pdf [file NIHMS1920544-supplement-Supinfo.pdf]
